# Supplementary material for: Considering the methodological limitations in the evidence base of antidepressants for depression: a reanalysis of a network meta-analysis
Source: PubMed Central journal article supplement — BMJ Open. 2019 Jun 27;9(6):e024886. doi: 10.1136/bmjopen-2018-024886 (PMC6597641; doi:10.1136/bmjopen-2018-024886), 2019-06-27
Supplement: bmjopen-2018-024886supp002.pdf [file bmjopen-2018-024886supp002.pdf]

# Considering the methodological limitations in the evidence base of antidepressants for depression: A reanalysis of a network meta-analysis

Klaus Munkholm <sup>a</sup>, Asger Sand Paludan-Müller <sup>a</sup>, Kim Boesen <sup>a</sup>

<sup>a</sup>Nordic Cochrane Centre, Rigshospitalet, Copenhagen, Denmark

## S2 Appendix

## Trial duration and long-term effect estimates

### Overall trial length

According to the trial characteristics by Cipriani et al.<sup>1</sup> 492 (94%) of the 522 included trials lasted between four and 12 weeks (figure 1), 28 trials (5%) lasted more than 12 weeks, and the trial duration was unclear for two trials (table 3).

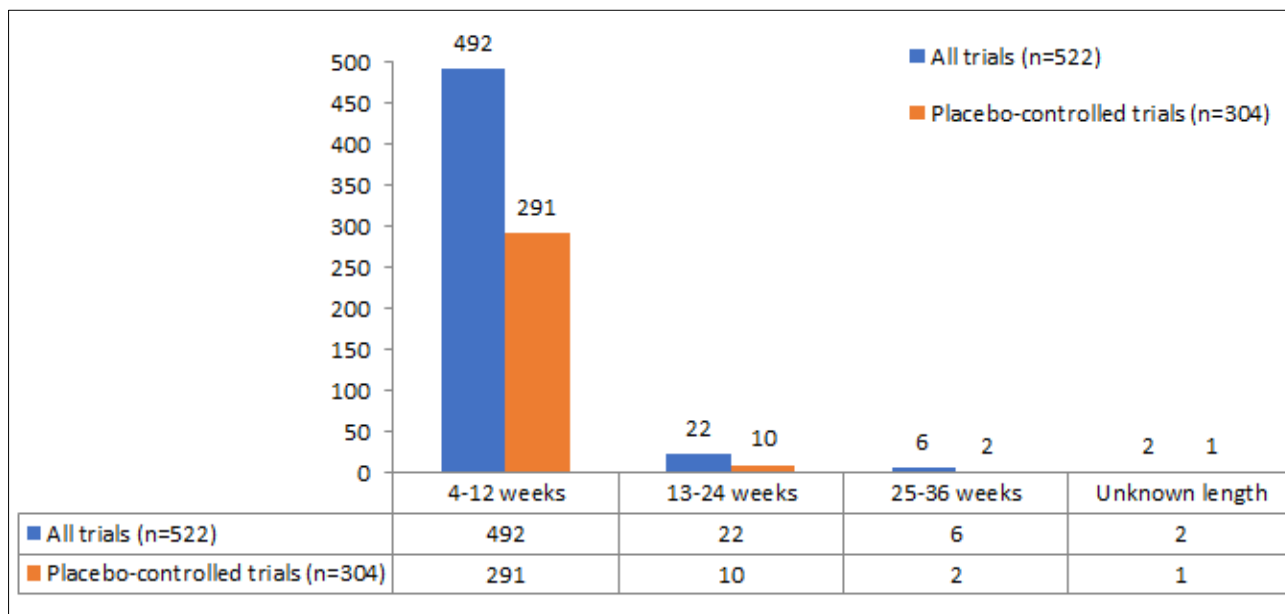

**Figure 1.** All 522 trials arranged into three follow-up periods according to Cipriani et al.'s trial characteristics: Four to 12 weeks (the period used by Cipriani et al.), 13 to 24 weeks, and 25 to 36 weeks<sup>1</sup>.

### Longer-term placebo-controlled trials

Of the 28 trials lasting more than 12 weeks, 12 trials had a placebo-controlled arm (table 3) and 16 were head-to-head trials. However, upon closer examination, eight of the 12 placebo-controlled trials consisted of several 'phases' and only four trials contained a continuous randomised placebo-controlled phase of more than 12 weeks (table 4). It is unclear why Cipriani et al.<sup>1</sup> did not list the correct trial length characteristics, since the various extension phases were described in the available documents, also for the unpublished trials.

**Table 1.** All 522 trials arranged according to the trial length characteristics by Cipriani et al.<sup>1</sup>

| Trial length according to Cipriani et al. <sup>1</sup> (N = 522) | Trials without a placebo arm (N) | Placebo-controlled trials (N) |
|------------------------------------------------------------------|----------------------------------|-------------------------------|
| 4 weeks                                                          | 9                                | 39                            |
| 5 weeks                                                          | 11                               | 4                             |
| 6 weeks                                                          | 92                               | 100                           |
| 7 weeks                                                          | 9                                | 0                             |
| 8 weeks                                                          | 59                               | 118                           |
| 9 weeks                                                          | 3                                | 2                             |
| 10 weeks                                                         | 4                                | 10                            |
| 12 weeks                                                         | 14                               | 18                            |
| 13 weeks                                                         | 1                                | 1                             |
| 16 weeks                                                         | 2                                | 2                             |
| 20 weeks                                                         | 0                                | 1                             |
| 24 weeks                                                         | 9                                | 6                             |

|                      |     |     |
|----------------------|-----|-----|
| 25 weeks             | 2   | 0   |
| 26 weeks             | 1   | 0   |
| 36 weeks             | 0   | 2   |
| Trial length unknown | 2   | 1   |
| Total                | 218 | 304 |

**Table 2.** Longer-term placebo-controlled trials (trial length of more than 12 weeks).

| Trial                             | Drug arm 1  | Drug arm 2 | Trial length according to Cipriani et al. (weeks) | Actual trial length (weeks) | Study design and phases                                                                                      |
|-----------------------------------|-------------|------------|---------------------------------------------------|-----------------------------|--------------------------------------------------------------------------------------------------------------|
| Oakes 2012a <sup>2</sup>          | duloxetine  | -          | 36                                                | 36                          | -                                                                                                            |
| Oakes 2012b <sup>2</sup>          | duloxetine  | -          | 36                                                | 36                          | -                                                                                                            |
| CL3-20098-022 <sup>3</sup>        | agomelatine | fluoxetine | 24                                                | 6 + 18                      | "Optional double-blind placebo-controlled extension" (page 24) for "responders to treatment" (page 26)       |
| CL3-20098-023 <sup>3</sup>        | agomelatine | paroxetine | 24                                                | 6 + 18                      | "Optional double-blind placebo-controlled extension" (page 24) for "W6 responders" (page 26)                 |
| CL3-20098-024 <sup>3</sup>        | agomelatine | fluoxetine | 24                                                | 6 + 18                      | "Optional double-blind placebo-controlled extension" (page 24) for "responders to treatment at W6" (page 26) |
| CL3-20098-026 <sup>3</sup>        | agomelatine | -          | 24                                                | 6 + 18                      | "18-week extension period" of "responders at W6" (page 42)                                                   |
| CL3-20098-070 <sup>4</sup>        | agomelatine | -          | 24                                                | 8 + 16                      | 16-week extension period for responders                                                                      |
| Robinson 2014 <sup>5</sup>        | duloxetine  | -          | 24                                                | 12 + 12                     | From week 12 to 20 placebo rescue or dose increase were available                                            |
| Lopez-Rodriguez 2004 <sup>6</sup> | fluoxetine  | -          | 20                                                | 20                          | -                                                                                                            |
| Barber 2011 <sup>7</sup>          | sertraline  | -          | 16                                                | 8 + 8                       | Non-responders on sertraline were switched to venlafaxin ER at week 8                                        |
| Dimidjian 2006 <sup>8</sup>       | paroxetine  | -          | 16                                                | 8 + 8                       | The blind was broken at week 8 and the placebo arm was offered other treatments                              |
| Lecrubier 1997 <sup>9</sup>       | venlafaxine | -          | 13                                                | 13                          | -                                                                                                            |

## References

1. Cipriani A, Furukawa TA, Salanti G, et al. Comparative efficacy and acceptability of 21 antidepressant drugs for the acute treatment of adults with major depressive disorder: a systematic review and network meta-analysis. *Lancet* 2018 doi: 10.1016/S0140-6736(17)32802-7 [published Online First: 2018/02/27]
2. Oakes TM, Myers AL, Marangell LB, et al. Assessment of depressive symptoms and functional outcomes in patients with major depressive disorder treated with duloxetine versus placebo: primary outcomes from two trials conducted under the same protocol. *Hum Psychopharmacol* 2012;27(1):47-56. doi: 10.1002/hup.1262 [published Online First: 2012/01/14]
3. CHMP assessment report for Thymanax. EMEA/H/C/000916. 2008 [Available from: [http://www.ema.europa.eu/docs/en\\_GB/document\\_library/EPAR\\_-\\_Public\\_assessment\\_report/human/000916/WC500038315.pdf](http://www.ema.europa.eu/docs/en_GB/document_library/EPAR_-_Public_assessment_report/human/000916/WC500038315.pdf) accessed 1 May 2018.
4. EudraCT Number 2009-011795-29. 2009 [Available from: <https://www.clinicaltrialsregister.eu/ctr-search/trial/2009-011795-29/FI> accessed 1 May 2018.
5. Robinson M, Oakes TM, Raskin J, et al. Acute and long-term treatment of late-life major depressive disorder: duloxetine versus placebo. *Am J Geriatr Psychiatry* 2014;22(1):34-45. doi: 10.1016/j.jagp.2013.01.019 [published Online First: 2013/12/10]
6. López RJ, López BMA, Vargas TBE, et al. Estudio doble ciego con antidepressivo, psicoterapia breve y placebo en pacientes con depresión leve a moderada. *Salud Mental* 2004;27(5):53-61.
7. Barber JP, Barrett MS, Gallop R, et al. Short-term dynamic psychotherapy versus pharmacotherapy for major depressive disorder: a randomized, placebo-controlled trial. *J Clin Psychiatry* 2012;73(1):66-73. doi: 10.4088/JCP.11m06831 [published Online First: 2011/12/14]
8. Dimidjian S, Hollon SD, Dobson KS, et al. Randomized trial of behavioral activation, cognitive therapy, and antidepressant medication in the acute treatment of adults with major depression. *J Consult Clin Psychol* 2006;74(4):658-70. doi: 10.1037/0022-006X.74.4.658 [published Online First: 2006/08/03]
9. Lecrubier Y, Bourin M, Moon CA, et al. Efficacy of venlafaxine in depressive illness in general practice. *Acta Psychiatr Scand* 1997;95(6):485-93. [published Online First: 1997/06/01]
