# Supplementary material for: Considering the methodological limitations in the evidence base of antidepressants for depression: a reanalysis of a network meta-analysis
Source: PubMed Central journal article supplement — BMJ Open. 2019 Jun 27;9(6):e024886. doi: 10.1136/bmjopen-2018-024886 (PMC6597641; doi:10.1136/bmjopen-2018-024886), 2019-06-27
Supplement: bmjopen-2018-024886supp004.pdf [file bmjopen-2018-024886supp004.pdf]

# Considering the methodological limitations in the evidence base of antidepressants for depression: A reanalysis of a network meta-analysis

Klaus Munkholm <sup>a</sup>, Asger Sand Paludan-Müller <sup>a</sup>, Kim Boesen <sup>a</sup>

<sup>a</sup> Nordic Cochrane Centre, Rigshospitalet, Copenhagen, Denmark

## S2 Table

**S2 Table.** Rating scales used in the included placebo-controlled trials (n = 304).<sup>1</sup>

| <b>Scale</b>     | <b>Number of trials</b> | <b>Number of treatment arms</b> |
|------------------|-------------------------|---------------------------------|
| HAMD17           | 137                     | 198                             |
| HAMD21           | 92                      | 139                             |
| HAMD24           | 13                      | 22                              |
| HAMD29           | 1                       | 2                               |
| HAMD31           | 1                       | 2                               |
| HAMD unspecified | 22                      | 25                              |
| IDS-IVR-30       | 1                       | 1                               |
| MADRS            | 29                      | 50                              |
| NA               | 8                       | 12                              |

NA: not available; HAMD17: 17-item Hamilton depression rating scale; IDS-IVR-30: 30-item Inventory of Depressive Symptomatology-Self Report; MADRS: Montgomery-Åsberg Depression Rating Scale.

## References

1. Cipriani A, Furukawa TA, Salanti G, et al. Comparative efficacy and acceptability of 21 antidepressant drugs for the acute treatment of adults with major depressive disorder: a systematic review and network meta-analysis. *Lancet* 2018 doi: 10.1016/S0140-6736(17)32802-7 [published Online First: 2018/02/27]
